# Supplementary material for: Constraint and trade-offs regulate energy expenditure during childhood
Source: PubMed Central journal article supplement — Sci Adv. 2019 Dec 18;5(12):eaax1065. doi: 10.1126/sciadv.aax1065 (PMC6989306; doi:10.1126/sciadv.aax1065), 2019-12-18
Supplement: aax1065_SM.pdf [file aax1065_SM.pdf]

## Supplementary Materials for

### Constraint and trade-offs regulate energy expenditure during childhood

Samuel S. Urlacher\*, J. Josh Snodgrass, Lara R. Dugas, Lawrence S. Sugiyama, Melissa A. Liebert,  
Cara J. Joyce, Herman Pontzer\*

\*Corresponding author. Email: samuel\_urlacher@baylor.edu (S.S.U.); herman.pontzer@duke.edu (H.P.)

Published 18 December 2019, *Sci. Adv.* **5**, eaax1065 (2019)  
DOI: 10.1126/sciadv.aax1065

#### The PDF file includes:

Fig. S1. TEE measures for Shuar children (red) and a larger and more diverse sample of industrialized cohorts (blue).

Fig. S2. Shuar arm muscle area (AMA) measures as percentiles of US age- and sex-matched references (NHANES III).

Table S1. Parameter estimates [ $\beta$  (SE)] for final energetics GLM models.

Table S2. Parameter estimates [ $\beta$  (SE)] for energetics GLM models that do not include FM as a predictor.

Table S3. Household-level lifestyle, economic, and dietary information for the Shuar study sample ( $n = 18$  households).

Table S4. Parameter estimates [ $\beta$  (SE)] for GLM models evaluating conservative values of Shuar REE that excluded initial (REE<sub>i</sub>) or single highest (REE<sub>h</sub>) repeated weekly measures.

Table S5. Parameter estimates [ $\beta$  (SE)] for GLM models using an alternative hydration constant of 0.75 for Shuar and US cohort FM and FFM calculation.

Table S6. Measured TEE and FFM using CRDS and duplicate measures (TEE<sub>irms</sub>; FFM<sub>irms</sub>) obtained for six participants using isotope ratio mass spectrometry.

Table S7. Measured REE and TEE for US/UK children and predicted values calculated by common prediction equations (that were developed using predominantly industrialized samples).

Legends for data files S1 to S3

References (44–50)

#### Other Supplementary Material for this manuscript includes the following:

(available at [advances.sciencemag.org/cgi/content/full/5/12/eaax1065/DC1](https://advances.sciencemag.org/cgi/content/full/5/12/eaax1065/DC1))

Data file S1 (Microsoft Excel format). Primary study data with variable list.

Data file S2 (Microsoft Excel format). Daily physical activity summary data for the Canadian cohort.

Data file S3 (Microsoft Excel format). Expanded industrialized sample data.

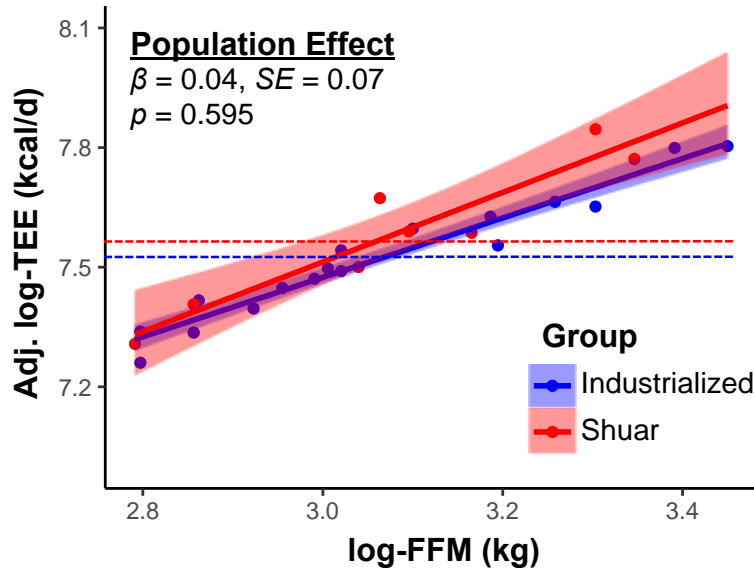

**Fig. S1. TEE measures for Shuar children (red) and a larger and more diverse sample of industrialized cohorts (blue).** Solid lines (shaded 95% confidence intervals) indicate regression of log-TEE on log-FFM adjusting for age, sex, and log-FM. Dotted lines denote group estimated marginal means from the final model that included log-FFM. No group difference was found in log-TEE ( $\beta = 0.04$ ,  $SE = 0.07$ ,  $p = 0.595$ ). Data points represent sample-level mean values (binned by 2-year age and sex groups for Shuar and reported 1 to 5-year age and sex groups for industrialized cohorts). Industrialized cohorts ( $N = 17$ ;  $N = 336$  children; age 5-10 years; healthy and normal weight) were drawn from the US (16, 44, 45), UK (17), and Australia (46, 47). Data and sample details are provided in Data S3. TEE = total energy expenditure; FM = fat mass; FFM = fat-free mass

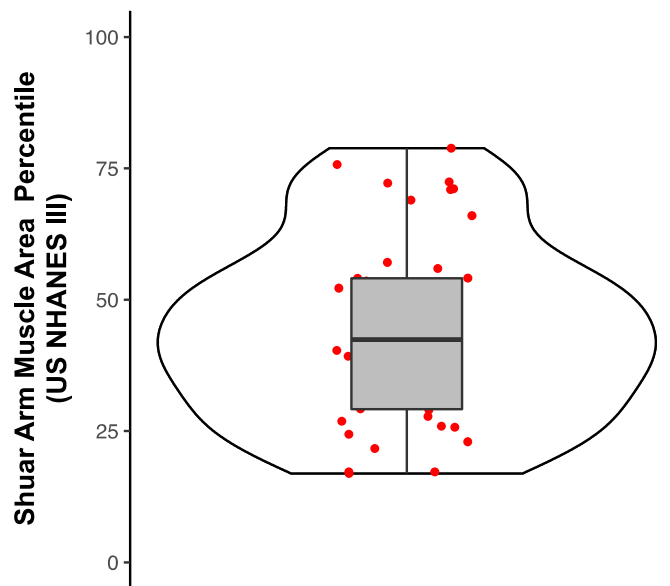

**Fig. S2. Shuar arm muscle area (AMA) measures as percentiles of US age- and sex-matched references (NHANES III).** Shuar mean AMA is equivalent to the US 44th percentile, indicating skeletal muscle mass approximating that of industrialized children. No difference in total FFM was observed between Shuar and US/UK children (Table 1), suggesting similar fat-free mass composition (i.e., skeletal muscle:organ mass ratio). Shuar AMA was calculated from arm skinfolds and circumference measures (48). Boxplot denotes 25th, 50th, and 75th quantiles.

**Table S1. Parameter estimates [ $\beta$  (SE)] for final energetics GLM models.**

|                                      | Model            |                  |                  |                 |
|--------------------------------------|------------------|------------------|------------------|-----------------|
|                                      | log-REE (kcal/d) | log-TEE (kcal/d) | log-AEE (kcal/d) | PAL             |
| Intercept                            | 5.45 (0.19)***   | 4.70 (0.24)***   | -0.66 (1.23)     | -0.31 (0.43)    |
| Age (yrs)                            | -0.02 (0.01)*    | 0.01 (0.01)      | 0.09 (0.05)      | 0.04 (0.02)*    |
| Sex (male)                           | 0.07 (0.02)**    | 0.04 (0.03)      | -0.06 (0.13)     | -0.03 (0.05)    |
| log-FM (kg)                          | 0.05 (0.03)      | -0.09 (0.04)*    | -0.52 (0.19)**   | -0.24 (0.07)*** |
| log-FFM (kg)                         | 0.53 (0.09)***   | 0.96 (0.11)***   | 2.35 (0.56)***   | 0.70 (0.20)***  |
| Population (Shuar)                   | 0.19 (0.03)***   | -0.04 (0.04)     | -0.71 (0.18)***  | -0.37 (0.06)*** |
| <i>Model adjusted. r<sup>2</sup></i> | 0.713            | 0.768            | 0.467            | 0.461           |

\*  $p < 0.05$ ; \*\*  $p < 0.01$ ; \*\*\*  $p < 0.001$

**Table S2. Parameter estimates [ $\beta$  (SE)] for energetics GLM models that do not include FM as a predictor. Results were consistent with final models.**

|                                      | Model            |                  |                  |                 |
|--------------------------------------|------------------|------------------|------------------|-----------------|
|                                      | log-REE (kcal/d) | log-TEE (kcal/d) | log-AEE (kcal/d) | PAL             |
| Intercept                            | 5.32 (0.18)***   | 4.94 (0.23)***   | 0.71 (1.18)      | 0.31 (0.43)     |
| Age (yrs)                            | -0.02 (0.01)**   | 0.01 (0.01)      | 0.11 (0.05)*     | 0.05 (0.02)*    |
| Sex (male)                           | 0.05 (0.02)**    | 0.07 (0.02)**    | 0.11 (0.12)      | 0.04 (0.04)     |
| log-FFM (kg)                         | 0.60 (0.08)***   | 0.81 (0.10)***   | 1.52 (0.50)**    | 0.32 (0.18)     |
| Population (Shuar)                   | 0.15 (0.02)***   | 0.03 (0.02)      | -0.31 (0.12)*    | -0.19 (0.04)*** |
| <i>Model adjusted. r<sup>2</sup></i> | 0.707            | 0.752            | 0.421            | 0.379           |

\*  $p < 0.05$ ; \*\*  $p < 0.01$ ; \*\*\*  $p < 0.001$

**Table S3. Household-level lifestyle, economic, and dietary information for the Shuar study sample ( $n = 18$  households).**

|                                                                   |            |
|-------------------------------------------------------------------|------------|
| <i>Lifestyle and Economic Variables (% of total or mean [SD])</i> |            |
| Household size (# individuals)                                    | 7.4 (2.4)  |
| Household member hunts (frequency/week)                           | 2.1 (2.0)  |
| Household member fishes (frequency/week)                          | 5.4 (2.2)  |
| Household member forages (frequency/week)                         | 2.8 (1.6)  |
| Income (total USD/month)                                          | 32 (31)    |
| Dirt-floor home (vs. wood plank, %)                               | 22%        |
| Have running water (%)                                            | 0%         |
| Boil water before drinking (%)                                    | 0%         |
| Have latrine (%)                                                  | 33%        |
| Cook with wood (%)                                                | 94%        |
| Sleep directly on floor (%)                                       | 39%        |
| Sleep using mosquito net (%)                                      | 39%        |
| Have light bulb (%)                                               | 94%        |
| <i>Dietary Variables (mean [SD])</i>                              |            |
| Consume garden item (frequency/week)                              | 33.5 (4.5) |
| Consume hunted item (frequency/week)                              | 1.3 (1.8)  |
| Consume fished item (frequency/week)                              | 3.7 (2.0)  |
| Consume market carbohydrate item (frequency/week)                 | 2.4 (3.6)  |
| Consume market fat/sugar item (frequency/week)                    | 3.0 (3.4)  |
| Consume market protein item (frequency/week)                      | 1.1 (2.0)  |

Market carbohydrate item = rice, pasta, bread; Market fat/sugar item = cooking oil, soda, potato chips, butter, cookies, sweets; Market protein item = beef, pork, milk

**Table S4. Parameter estimates [ $\beta$  (SE)] for GLM models evaluating conservative values of Shuar REE that excluded initial (REEi) or single highest (REEh) repeated weekly measures. Results were consistent with final models.**

|                                      | Model             |                   |
|--------------------------------------|-------------------|-------------------|
|                                      | log-REEi (kcal/d) | log-REEh (kcal/d) |
| Intercept                            | 5.42 (0.20)***    | 5.41 (0.20)***    |
| Age (yrs)                            | -0.02 (0.01)**    | -0.02 (0.01)*     |
| Sex (male)                           | 0.07 (0.02)**     | 0.07 (0.02)**     |
| log-FM (kg)                          | 0.06 (0.03)       | 0.05 (0.03)       |
| log-FFM (kg)                         | 0.53 (0.09)***    | 0.54 (0.09)***    |
| Population (Shuar)                   | 0.17 (0.03)***    | 0.15 (0.03)***    |
| <i>Model adjusted. r<sup>2</sup></i> | 0.681             | 0.669             |

\*  $p < 0.05$ ; \*\*  $p < 0.01$ ; \*\*\*  $p < 0.001$

**Table S5. Parameter estimates [ $\beta$  (SE)] for GLM models using an alternative hydration constant of 0.75 for Shuar and US cohort FM and FFM calculation. Results were consistent with final models.**

|                                      | Model            |                  |                  |                 |
|--------------------------------------|------------------|------------------|------------------|-----------------|
|                                      | log-REE (kcal/d) | log-TEE (kcal/d) | log-AEE (kcal/d) | PAL             |
| Intercept                            | 5.46 (0.20)***   | 4.77 (0.26)***   | -0.54 (1.30)     | -0.21 (0.46)    |
| Age (yrs)                            | -0.02 (0.01)*    | 0.01 (0.01)      | 0.11 (0.05)*     | 0.05 (0.02)**   |
| Sex (male)                           | 0.07 (0.02)**    | 0.05 (0.03)      | -0.04 (0.13)     | -0.02 (0.05)    |
| log-FM (kg)                          | 0.06 (0.03)      | -0.08 (0.05)     | -0.53 (0.22)*    | -0.23 (0.08)**  |
| log-FFM (kg)                         | 0.52 (0.09)***   | 0.92 (0.12)***   | 2.30 (0.60)***   | 0.64 (0.21)**   |
| Population (Shuar)                   | 0.19 (0.03)***   | -0.01 (0.04)     | -0.63 (0.18)***  | -0.33 (0.07)*** |
| <i>Model adjusted. r<sup>2</sup></i> | 0.714            | 0.748            | 0.448            | 0.426           |

\*  $p < 0.05$ ; \*\*  $p < 0.01$ ; \*\*\*  $p < 0.001$

**Table S6. Measured TEE and FFM using CRDS and duplicate measures (TEEirms; FFMirms) obtained for six participants using isotope ratio mass spectrometry. Results demonstrate between-method reliability.**

|                  | TEE<br>(kcal/d)  | TEEirms<br>(kcal/d) | TEEdif<br>(kcal/d) | TEEdif<br>(%)    | FFM (kg)          | FFMirms<br>(kg)   | FFMdif<br>(kg)    | FFMdif<br>(%)    |
|------------------|------------------|---------------------|--------------------|------------------|-------------------|-------------------|-------------------|------------------|
| Child 1          | 1819             | 1978                | -159               | 8.0              | 22.3              | 22.5              | -0.1              | 0.7              |
| Child 2          | 1973             | 1935                | 38                 | 2.0              | 23.5              | 23.9              | -0.4              | 1.7              |
| Child 3          | 2052             | 2034                | 18                 | 0.9              | 27.9              | 28.2              | -0.3              | 1.1              |
| Child 4          | 2209             | 2478                | -269               | 10.9             | 24.1              | 24.4              | -0.3              | 1.2              |
| Child 5          | 1514             | 1403                | 111                | 7.9              | 15.9              | 15.9              | 0.0               | 0.0              |
| Child 6          | 1678             | 1729                | -51                | 2.9              | 18.1              | 18.3              | -0.2              | 1.1              |
| <i>Mean (SD)</i> | <i>1874(255)</i> | <i>1926 (355)</i>   | <i>-52 (140)</i>   | <i>5.4 (4.0)</i> | <i>22.0 (4.3)</i> | <i>22.2 (4.4)</i> | <i>-0.2 (0.1)</i> | <i>1.0 (0.6)</i> |

**Table S7. Measured REE and TEE for US/UK children and predicted values calculated by common prediction equations (that were developed using predominantly industrialized samples).** Small differences between measured and predicted values support the treatment of the US and UK cohorts as generally representative of industrialized children.

|     | Measured <sup>†</sup><br>(kcal/d) | Predicted <sup>‡</sup><br>(kcal/d) | Difference<br>(kcal/d) | Difference<br>(%) |
|-----|-----------------------------------|------------------------------------|------------------------|-------------------|
| REE | 1057                              | 1027                               | 30                     | 2.8               |
| TEE | 1719                              | 1651                               | 68                     | 3.9               |

<sup>†</sup>Unadjusted values; <sup>‡</sup>Predicted values for REE were calculated using the childhood-specific equations of Schofield (49; based on sex, age, weight, and height). Predicted values for TEE were calculated using the childhood-specific WHO equations (50; based on sex and quadratic weight).

**Data file S1. Primary study data with variable list.**

**Data file S2. Daily physical activity summary data for the Canadian cohort.**

**Data file S3. Expanded industrialized sample data.**
